1 **Running Head:**

2 White spotting in the American Paint Horse

3 **Title:**

4 **Impact of white spotting alleles, including *W20*, on phenotype in the American Paint Horse**

5

6 Samantha A. Brooks<sup>\*</sup>, Katelyn M. Palermo<sup>\*</sup>, Alisha Kahn<sup>\*</sup>, and Jessica Hein<sup>#</sup>

7 <sup>\*</sup>University of Florida Department of Animal Sciences, UF Genetics Institute, Gainesville FL,  
8 32611-0910

9 <sup>#</sup>American Paint Horse Association, Fort Worth TX, 76161-0023

10

11 **Acknowledgments:**

12 The authors would like to thank the many APHA staff members for their efforts in submitting and  
13 collating the data analyzed in this study. Thanks to the UF undergraduate researchers who  
14 generously volunteered for data-entry work on this project: Hannah Hillard, Kalisse Horne, Rachel  
15 Kullman, Erica Riano, Matt Winter, Courtney McCreary, Rachel Shepherd, Anna Moskovitz, and  
16 Kaycie Miller. Our gratitude to Dr. Ernie Bailey for proofreading the manuscript.

17 **Summary:**

18 The American Paint Horse Association (APHA) records pedigree and performance information for  
19 their breed, a stock-type horse valued as a working farm or ranch horse and as pleasure horses. As  
20 the name implies, the breed is also valued for attractive white spotting patterns on the coat. The  
21 APHA utilizes visual inspections of photographs to determine if coat spotting exceeds threshold  
22 anatomical landmarks considered characteristic of desirable patterns. Horses with sufficient white  
23 patterning enter the “Regular” registry, rather than the “Solid Paint-bred” division, providing a  
24 threshold modeled phenotype. Genetic studies previously defined sequence variants corresponding  
25 to 35 alleles for white spotting in the horse. Here, we calculate the allele frequency for nine common  
26 white spotting alleles in the American Paint horse using a sample of 1,054 registered animals. The  
27 APHA spotting phenotype is altered by additive interactions among spotting loci, and epistatically by  
28 the *MC1R* and *ASIP* genes controlling pigment production. The *W20* allele within the *KIT* gene,  
29 independent of other known spotting alleles, was strongly associated with the APHA-defined white  
30 spotting phenotype ( $p = 1.86 \times 10^{-18}$ ), refuting reports that *W20* acts only as a modifier of other  
31 underlying white spotting patterns. The parentage of an individual horse, either American Paint or  
32 American Quarter Horse, did not alter the likelihood of entering the APHA Regular registry. An  
33 empirical definition of the action of these genetic loci on the APHA-defined white spotting phenotype  
34 will allow more accurate application of genome-assisted selection for improving color production and  
35 marketability of APHA horses.

36  
37 **Key words:**

38 *KIT*

39 coat color

40 *ASIP*

41 *MC1R*

42 *W20*

43 American Paint Horse

44

## 15 Introduction:

16 Paint Horses themselves were not new to the equine industry—colorful pinto horses have for  
17 decades been staple stablemates across the United States, as favorites among some horsemen for  
18 their flashy coats and versatility, but were culled from the registry by traditionalist breeders of the  
19 American Quarter Horse who view white spotting patterns as an undesirable trait. “Cropout” horses—  
20 those of Quarter Horse or Thoroughbred descent born with excessive white markings on their coats,  
21 and therefore refused registration with the American Quarter Horse Association—along with other  
22 colorful stock that sported white spotting patterns became the foundation of a new breed. The  
23 American Paint Stock Horse Association was founded in 1962, the brainchild of Rebecca Tyler  
24 Lockhart, a well-respected and well-connected North Texas horsewoman with a penchant for colorful  
25 stock horses (Hood 1987). The fledgling association’s directives were outlined: collect, preserve and  
26 record the pedigrees of Paint stock horses; publish a stud book; maintain a registry; and regulate the  
27 breed’s exhibition, publicity, sales and racing. Known as the American Paint Horse Association  
28 (APHA) since 1965, the association originally counted 3,800 registered Paint Horses and 1,300  
29 members at that time (Hein 2012). Since its inception, registration of the Paint Horse has been based  
30 primarily on a combination of pedigree and phenotype in order to select for the white-patterned,  
31 stock-type horse valued by APHA’s founders. Initially, APHA’s bloodline requirements remained  
32 “open,” meaning horses could be registered with APHA so long as they met the phenotypic  
33 requirements of a spotted stock-type horse. As of January 1, 1980, the association requires all fully-  
34 registered APHA horses to have a sire and dam registered with either the American Paint Horse  
35 Association, the American Quarter Horse Association or The Jockey Club, a standard that remains  
36 today (APHA 2018).

37 During the APHA registration process, horses are designated into one of two sub-registries  
38 based on the presence or absence of qualifying natural white markings on their coats: the Regular  
39 registry or the Solid Paint-bred registry. Regular registry status is granted for horses that meet white  
40 spotting requirements as outlined in the *APHA Rule Book* (APHA 2018). The patterns desired by the  
41 APHA extend beyond what is typically observed as an average white marking on the face or legs  
42 (Haase et al. 2013) and exclude markings created by the *Leopard* locus (Bellone et al. 2013).

43 With more than 1.09 million horses registered with its organization as of May 2019, the APHA  
44 ranks as the second-largest equine breed association in the world. According to the American Horse  
45 Council Foundation’s 2017 National Economic Impact Study, the equine industry is directly

76 responsible for \$50 billion in U.S. economic impact, nearly 988,400 jobs, and \$38 billion in wages,  
77 salaries and benefits; when expanded to include all associated impacts, total contributions include  
78 \$122 billion to the U.S. economy and 1.7 million jobs (American Horse Council Foundation 2019).  
79 While the American Paint Horse is valued for conformation and performance traits, the white spotting  
80 pattern (reflected by the registry designation of either Regular or Solid Paint-bred) exerts an  
81 overwhelming influence on the value of individual horses (Brooks et al. 2007).

82 In the horse, at least 35 known white spotting polymorphisms underly many of the coat  
83 patterns valued by members of the APHA (OMIA 2019). Yet, the population frequencies of these  
84 alleles lack investigation, and despite the easily applied Mendelian inheritance patterns for most of  
85 these alleles, genetic testing for selection of breeding stock remains underutilized in the industry.  
86 Only recently the APHA industry has expressed an interest in using readily available genetic tools to  
87 improve their color production. Previously, selective breeding for spotting patterns in the American  
88 Paint Horse was commonly based on hearsay, personal experience, and limited observations.

89 When registering a Paint Horse today, the applicant provides identifying information pertaining  
90 to the foal, including its date of birth, color, pattern, sex, parentage and ownership. The APHA  
91 requires parentage verification via genetic testing when the horse is the product of breeding with  
92 transported or frozen semen, embryo transfer or vitrified embryo transfer, or other special situations,  
93 such as when registering a horse over age 10, and for all Quarter Horses and Thoroughbreds  
94 applying for registration as Paint Horses (APHA 2018).

95 The applicant provides a minimum of four full-color photographs of the horse, showing the  
96 entire animal from the left side, right side, front and rear. Additional photographs of spotted areas of  
97 the coat might be required by APHA staff to verify that the pattern meets registration guidelines in  
98 terms of the location, size and requirement for underlying skin to also be unpigmented (APHA 2018).  
99 The photographs become part of the horse's permanent record at APHA and are used to identify the  
100 animal throughout its life. Trained APHA staff members determine the registration category for each  
101 horse by visual inspection to confirm that a horse's natural white spotting patterns meets APHA's  
102 standard. All horses in this study were examined using photographs submitted by the owner. The  
103 quality of the submitted photographs was variable and added additional challenges to the  
104 interpretation of photographic evidence of the pattern relative to the APHA standards.

105 In brief, unpigmented areas characterizing APHA-accepted white spotting patterns must  
106 include both white hair and skin and are found on the face extending beyond a reference line from the

base of the horse's ear to the outside corner of the eye to the corner of the mouth and under the chin to the opposite corner of the mouth (Figure 1). On the body, qualifying depigmented areas must occur above a perpendicular line around the leg located at the center of the knee or hock (Figure 1). These spotting patterns must include a minimum of two inches of solid white hair with some underlying unpigmented skin in the qualifying area. The Solid Paint-Bred registry is used for horses who meet the parentage requirement but lack the minimum requirement for white spotted skin and coats as defined in the rulebook (APHA 2018).

Recent work highlighting “exceptions” to proposed qualitative phenotypes for these loci emphasizes the need for application of impartial and quantitative assessments capturing the full breadth of phenotypes resulting from these variants (Druml et al. 2018). The goals of this study aim to: establish allele frequencies for known white spotting alleles in the American Paint Horse, investigate association of these loci with a threshold phenotype uniformly defined by the APHA, identify interactions between loci, and to test association of the *W20* allele to the APHA photo-based threshold phenotype.

## Materials and Methods:

### *Retrospective Registration Records*

The American Paint Horse Association provided data for a sampling of 1,054 horses born and registered between 1992 and 2018 including: registered name and number, registration type (“Regular” registry” *ie* possessing a spotted coat or “Solid Paint-Bred” phenotype), age, and sex for each horse, as well as the registry and registration type of the sire and dam for that horse. The original photos submitted by the applicant for evaluation of the white spotting pattern on the horse at the time of registration were also provided by the APHA and used to confirm predicted phenotypes by visual inspection from a single experienced observer blinded to the identity and genotype of the horse (SAB). In 2012, the APHA began partnering with commercial providers of genetic testing to record genotypes on their registered horses. These 1,054 horses were voluntarily tested for color alleles by their owners for their own educational use or interests. Results were already on file with APHA and although they are not a randomly extracted subset of all APHA registrations, the large sample size does offer the opportunity to investigate important questions regarding the action of these alleles.

## 37 *Genotypes*

38 Each horse was genotyped for nine spotting pattern loci using a commercial service  
39 (Veterinary Genetics Laboratory, University of California, Davis) and the data shared with the APHA  
40 through a collaborative agreement. Alleles at the following loci were examined (Table 1): *KIT*- *TO*,  
41 *SB1*, *W5*, *W10*, *W20* or “*N*” (Brooks & Bailey 2005; Brooks *et al.* 2007; Haase *et al.* 2009; Hauswirth  
42 *et al.* 2013), *EDNRB*- *O* or “*N*” (Metallinos *et al.* 1998; Santschi *et al.* 1998; Yang *et al.* 1998), *MITF*-  
43 *SW1*, *SW3* or *N* and *PAX3*- *SW2* or “*N*” (Hauswirth *et al.* 2012). The testing service provider  
44 designates the wild type allele as “*N*”. A few additional genetic variants associated with white spotting  
45 patterns in the horse are documented in the scientific literature, but were either not available  
46 commercially at the time of testing and/or do not commonly segregate in the APHA and are therefore  
47 not relevant to this population (for a comprehensive catalog of spotting alleles in the horse see  
48 OMIA.org). Additionally, two known pigmentation loci were genotyped for investigation of epistasis:  
49 *MC1R*- *E* or *e* (Marklund *et al.* 1996), *ASIP*- *A* or *a* (Rieder *et al.* 2001). For the purpose of calculating  
50 allele frequencies we refer to the allele carried by the reference genome assembly (EquCab3.0) as  
51 the wild type (Kalbfleisch *et al.* 2018).

## 53 *Statistical analyses*

54 Analyses were conducted in the JMP Pro v14.1.0 package (SAS Institute Inc.). Additive effect  
55 of multiple white spotting loci tested by a logistic regression of the number of alleles against the two  
56 possible registry categories. To measure the impact of the *MC1R*-*ASIP* signaling system on white  
57 spotting, a subset of 364 horses that possessed only one spotting allele (controlling for any effect due  
58 to interactions between multiple spotting loci) was utilized, excluding all horses possessing a *Tobiano*  
59 allele (in order to avoid the impact of linkage between *MC1R* alleles and *TO*). Given the well  
60 documented interaction between alleles at *ASIP* and its antagonistic target, the *MC1R* receptor, a  
61 logistic regression model was constructed comparing the APHA registry phenotype (Regular or Solid  
62 Paint-Bred) with the linear ranking of the genotypes by the predicted signaling activity and base color  
63 phenotype. Thus, the *E*- *a/a* genotype, likely resulting in a constitutively active *MC1R* receptor and  
64 the black base color, was scored “0”; the wild-type genotype *E*- *A/-*, predicted to have normal  
65 signaling activity and a bay base color, was given a “1”; and the *e/e* genotype, resulting in a loss of  
66 *MC1R* signaling regardless of the *ASIP* genotype and a chestnut base coat, received a score of “2”.  
67 4.2 (Barrett *et al.* 2005). Association between genotypes for the *W20* allele was assessed in a subset

58 529 horses bearing no other white spotting alleles at any of the other eight sites tested using a Chi-  
59 square test under a dominant model (merging the *W20/N* and *W20/W20* genotypes).

## 70 **Results and Discussion:**

### 71 *Phenotype distribution varies for each white spotting genotype*

72 The 1,054 horses registered with the APHA in the examined time-period included 406 stallions,  
73 90 geldings and 558 mares submitted for registration at a mean age of 1.07 years between 1992 and  
74 2018. 90% of the sample comprised horses registered post-2004. Among these 1,054 horses, 773  
75 were designated to the Regular registry, while 281 entered the Solid Paint-Bred category. This  
76 sampling did not represent an unbiased observation of all foals produced from APHA-registered  
77 breedings since it is likely that not all foals are submitted for registration (especially if the foal is  
78 unlikely to achieve Regular registry status), few owners choose to have their registered horses  
79 genotyped limiting available data for this retrospective study, and records are not retained by the  
80 APHA on submitted horses ultimately rejected for registration. Nonetheless, this sample is the largest  
81 collection of genotype data and white spotting phenotypes in the horse.

82 Genotypic and allele frequencies for each of the nine variants examined are presented in  
83 Table 2. Presence of just a single alternate allele resulted in APHA designation to the Regular  
84 registry for *IKIT\*TO*, *MITF\*SW3*, and *KIT\*SB1*, although the latter two genotypes were only rarely  
85 observed ( $n = x$  and  $x$  respectively, Table X). As expected, we did not observe a homozygous  
86 *EDNRB\*O* genotype as this causes the well-documented Lethal White Overo Syndrome (Metallinos  
87 *et al.* 1998; Santschi *et al.* 1998; Yang *et al.* 1998). However, a single horse homozygous for the  
88 *SW2* allele was identified, which is a state previously hypothesized to be lethal based on comparisons  
89 to similar variants in the *PAX3* gene of other species (Hauswirth *et al.* 2012). This genotype should  
90 be confirmed, and this horse examined for any deleterious health effects resulting from homozygosity  
91 for this allele.

92 109 horses possessed at least one white spotting allele but were APHA registered Solid Paint-  
93 bred based on visual examination of photographs. Visual inspection of the photographs by a single  
94 blinded observer revealed that the extent and distribution of white markings in these horses often fell  
95 just below the guidelines of the *APHA Rule Book* (2018) but were more extensive than the common  
96 white markings described as “socks” on the limbs or a “blaze” on the face in other studies (Haase *et*  
97 *al.* 2013). The phenotype of these horses likely represents the tail of the natural distribution of total  
98 depigmented area characteristic of the unique reduction in melanocyte migration for each of these

alleles. Previous work observed production of foals with phenotypes very typical of the *TO* allele from parents with a *TO* allele but a very minimal white phenotype (Stachurska & Jansen 2015). Thus, these horses likely possess genetic value as producers of future spotted foals, although on the surface they do not fit the visual description of a Regular registry horse.

One horse categorized as “Solid” possessed a total of five white spotting alleles and an entirely white coat. Although this animal has a high breeding value for white spotting, it was registered in the less-valued Solid Paint-Bred category because the horse did not exhibit at least two inches of contrasting colored hair in his coat, per APHA registration guidelines. In these cases, phenotyping by photograph and use of the *APHA Rule Book* description for Regular registry white spotting patterns misses horses with superior genetic value for production of white spotting patterns.

For 97 horses recorded by APHA in the Regular registry based on their photographic phenotype, genetic testing results did not identify possession of any of the nine white spotting alleles evaluated. In some cases, white spotting patterns in these horses may be due to rare genetic markers not tested in this study, or patterns for which genetic markers/causative variations are not yet known. Visual inspection of the registration photographs for these 97 horses revealed that 31 possessed patterns consistent with white spotting loci. These 31 included many phenotypes resembling those generated by alleles known but not genotyped in this cohort, including *SW4* (Hauswirth *et al.* 2013), *SW5* (Henkel *et al.* 2019), and more than 27 other alleles at the *KIT* locus. We also observed among these 31 horses some well-recognized patterns with yet unknown genetic etiology (*i.e.* the “Rabicano” pattern) and two horses with previously undocumented and distinct white spotting phenotypes. Phenotypes for the remaining 66 (68%) horses fell within the described range for common white markings of the face and legs (Haase *et al.* 2013), or typified the roan and grey coat colors. Roan and grey do introduce white hair into the coat, but in a more interspersed manner than desired by the APHA (Marklund *et al.* 1999; Sundstrom *et al.* 2012).

In total, the predicted phenotype from the genotypes at the nine spotting variants investigated here agreed with the Regular registry (spotted) classification in 95.4% of horses, demonstrating that these nine alleles account for an overwhelming majority of spotting phenotypes present in the APHA. However, the photo-based designation to the Regular or Solid Paint-Bred categories disagreed with the genotyped presence or absence of a white spotting allele in 17% of horses (206) submitted for registration. This discordance demonstrates the need for separate selection tools and interpretations



29 for each of the functions of the registry: quantification of desirable visual phenotypes versus  
30 assessment of breeding value for production of white spotted foals.

31  
32 *Cumulative interactions among spotting loci, and between spotting loci and alleles for base coat color,*  
33 *additively increase white spotting phenotypes above the APHA threshold*

34 The frequency of the Regular registry threshold phenotype varied by allele and by allele  
35 combination (Table 3), however sample sizes within each possible combination were still too small to  
36 statistically examine specific interactions between loci. However, excluding the one horse possessing  
37 five alleles and an entirely white coat (considered a Solid Paint-Bred under current rules,) horses with  
38 an increasing number of spotting alleles are more likely to exhibit a phenotype that exceeds the  
39 APHA threshold for the Regular registry (Chi-square = 226.11,  $p < 0.0001$ , Table 4). Thus, the nine  
40 spotting alleles examined here act collectively in an additive fashion, increasing the proportion of  
41 white on the horse above the APHA Regular registry phenotype threshold.

42 Although the *MC1R* signaling pathway primarily contributes to pigment switching between  
43 eumelanin and pheomelanin, loss-of-function alleles at the *MC1R* locus can reduce migration of  
44 melanocyte stem cells (Chou et al. 2013). Assessing the effect of *MC1R* signaling on depigmentation  
45 phenotypes resulting from the *KIT* locus is difficult in the horse as the physical proximity of these two  
46 genes on ECA 3 could produce an association with white spotting due to linkage. Indeed,  
47 suppression of recombination is well documented by the *Tobiano* allele, a 36 Mb paracentric  
48 inversion lying within the 41 Mb span between the *KIT* and *MC1R* genes on ECA3  
49 (Trommershausen-Smith 1978; Brooks et al. 2007). In this dataset, we observed linkage between  
50 *MC1R\*E* and the *TO* inversion allele ( $n = 1054$ ,  $r^2 = 0.4$ ), but not between *MC1R* and *KIT\*W20*.  
51 Therefore, linkage between *MC1R* and the *Tobiano* allele likely arises solely from recombination  
52 suppression generated by the *Tobiano* paracentric inversion, and not from the physical proximity of  
53 these two genes on the q-arm of ECA3.

54 Before assessing modification of spotting phenotype by alleles at *MC1R* and *ASIP*, we  
55 selected a subset of horses that possessed just one spotting allele (avoiding any coincidental  
56 interaction across multiple spotting alleles) and excluding any horse with a *TO* allele (likely to produce  
57 association for *MC1R* due to recombination suppression on ECA3). Among these 368, horses we  
58 observed a significant effect of the *MC1R/ASIP* signaling system on the APHA-defined Regular

59 registry white spotting phenotype (Table 4,  $p = 0.0171$ ), with the  $e/e$  genotype producing the highest  
50 proportion of Regular registry horses.

51 The sex of the individual horse did not significantly impact the registry designation when  
52 examined within 461 horses possessing just one white spotting allele (Chi-square test,  $p = 0.209$ ).  
53 Across the entire sample population of 1,054 horses, stallions were more likely to enter the Regular  
54 registry than mares or geldings ( $p < 0.0001$ ), but this may reflect a tendency for applicants to submit  
55 registrations on colts with some prospect as future stallions, rather than an influence of sex or  
56 castration on white spotting phenotype.

### 58 *The W20 allele results in white spotting, independent of other known alleles*

59 The first published observation of the  $W20$  allele came from a study searching for causative  
60 variants in horse with white coats, phenotypes that left the majority of the skin surface totally  
61 unpigmented, and therefore did not attempt to document relatively less extensive white spotting  
62 phenotypes among their sampled population (Haase et al. 2007). Subsequently, the authors  
63 examined the  $W20$  variant in a larger set of horses ( $n = 52$ ) and noted a compound heterozygote  
64 effect creating extensive white patterning in horses with the  $W5/W20$  genotype, and observing a  
65 significant effect of the  $W20$  allele generating a white spotting phenotype more expansive than the  
66 typical white markings on the face and legs (Hauswirth et al. 2013). These authors state the  
67 circumstances in their publication: “We previously discovered a missense variant in exon 14 of the  
68 equine KIT gene (c.2045G>A; p.Arg682His) but did not immediately recognise [sic] its functional role  
69 (Haase et al. 2007).” However, in the eyes of the lay audience, the latter publication was eclipsed by  
70 the 2007 paper containing limited observations, and the lack of data specifically addressing the  
71 phenotype produced by the  $W20$  allele led to public claims that there is no, or only a “subtle” impact  
72 from the  $W20$  allele on white spotting  
73 (<https://www.vgl.ucdavis.edu/services/horse/dominantwhite.php>).

74 However, in this study photographic assessment of 529 APHA horses possessing only the  $+/+$   
75 ( $n = 270$ ),  $W20/+$  ( $n = 225$ ) and  $W20/W20$  ( $n = 34$ ) genotypes (no other spotting alleles at any of the 8  
76 remaining loci tested) revealed that  $W20$  is indeed significantly associated with white spotting  
77 patterns on the coat and is a common variant among Regular registry APHA horses (Chi-square test  
78 under a dominant model,  $p = 1.86 \times 10^{-18}$ , Table 3). Clearly,  $W20$  strongly correlates with the white

spotting phenotype as defined by the *APHA Rule Book*. Novel white spotting patterns likely appear in 2.9% of the population (discussed above), and thus would not be sufficient on their own to coincidentally explain the effect of *W20* on the Regular registry spotting phenotype, as has been previously suggested by breeders of APHA horses. The significantly increased likelihood of achieving Regular registry status among horses carrying only the *W20* allele conclusively demonstrates the value of this trait in genomic selection schemes for breeders seeking to improve their production of white spotted, Regular registry eligible foals.

#### *No evidence for unknown white spotting phenotype “modifying” alleles*

Given the historical selective pressure to eliminate white spotting phenotypes in the American Quarter Horse breed (AQHA 2019) and the rarity of white spotting phenotypes within the Thoroughbred breed (often used in the production of American Quarter Horses), APHA breeders are concerned that undiscovered “modifying” alleles capable of reducing the white spotting phenotypes may be present in the American Quarter Horse population. As APHA rules permit cross-breeding with American Quarter Horses or Thoroughbred horses, as well as registration of horses from these breeds that exhibit approved white spotting phenotypes, in-flow of “modifying” alleles could negatively impact the expression of white spotting phenotypes on APHA horses in future generations. 335 registrations were examined where the sire of the submitted horse belonged to the APHA Regular registry and the dam was registered as either Solid Paint-Bred (n= 189) versus those with dams from the American Quarter Horse Association or The Jockey Club (Thoroughbred) registries (n= 146). No significant difference was observed in the Regular vs. Solid Paint-Bred registry status of foals from dams belonging to the Solid Paint-Bred registry compared to those with dams registered with the AQHA or The Jockey Club (Chi-square test  $p= 0.704$ ). Finally, at the genome-wide scale, the genetic background of horses from the APHA and AQHA registries is very similar (Petersen et al. 2013), and written history documents many AQHA-registered foundation animals at the inception of the APHA.

#### *Conclusions*

This study documents that we now know most of the genetic markers responsible for the iconic color patterns valued by APHA breeders. These loci are valuable tools for prediction of the genetic value of breeding stock, thereby optimizing future production of spotted foals. Identification of

19 phenotype-altering epistatic interactions between the nine spotting loci tested, as well as with the  
20 *MC1R-ASIP* signaling system, will improve genotype-based phenotype predictions. Genetic tools  
21 could rapidly improve the accuracy of selection for white spotting in the horse and may provide  
22 significant economic savings compared to the time-consuming photo-analysis approach currently  
23 used to register APHA horses.

24

25

## 26 Literature Cited:

- 27 1. American Horse Council Foundation (2019) 2017 Economic Impact Study of the U.S. Horse Industry.
- 28 2. APHA (2018) *2018 APHA Rule Book*. American Paint Horse Association, Fort Worth, Texas.
- 29 3. AQHA (2019) Flashy Paint Coat Color. URL <https://www.aqha.com/-/flashy-paint-coat-color>.
- 30 4. Barrett J.C., Fry B., Maller J. & Daly M.J. (2005) Haploview: analysis and visualization of LD and haplotype maps. *Bioinformatics* 21, 263-5.
- 31 5. Bellone R.R., Holl H., Setaluri V., Devi S., Maddodi N., Archer S., Sandmeyer L., Ludwig A., Foerster D., Pruvost M.,  
32 Reissmann M., Bortfeldt R., Adelson D.L., Lim S.L., Nelson J., Haase B., Engensteiner M., Leeb T., Forsyth G.,  
33 Mienaltowski M.J., Mahadevan P., Hofreiter M., Paijmans J.L.A., Gonzalez-Fortes G., Grahn B. & Brooks S.A.  
34 (2013) Evidence for a Retroviral Insertion in TRPM1 as the Cause of Congenital Stationary Night Blindness and  
35 Leopard Complex Spotting in the Horse. *Plos One* 8.
- 36 6. Brooks S.A. & Bailey E. (2005) Exon skipping in the KIT gene causes a Sabino spotting pattern in horses. *Mamm*  
37 *Genome* 16, 893-902.
- 38 7. Brooks S.A., Lear T.L., Adelson D.L. & Bailey E. (2007) A chromosome inversion near the KIT gene and the  
39 Tobiano spotting pattern in horses. *Cytogenetic and genome research* 119, 225-30.
- 40 8. Chou W.C., Takeo M., Rabbani P., Hu H., Lee W., Chung Y.R., Carucci J., Overbeek P. & Ito M. (2013) Direct  
41 migration of follicular melanocyte stem cells to the epidermis after wounding or UVB irradiation is dependent on  
42 Mc1r signaling. *Nat Med* 19, 924-9.
- 43 9. Druml T., Grilz-Seger G., Neuditschko M., Horna M., Ricard A., Pausch H. & Brem G. (2018) Novel insights into  
44 Sabino1 and splashed white coat color patterns in horses. *Anim Genet* 49, 249-53.
- 45 10. Haase B., Brooks S.A., Schlumbaum A., Azor P.J., Bailey E., Alaeddine F., Mevissen M., Burger D., Poncet P.A.,  
46 Rieder S. & Leeb T. (2007) Allelic heterogeneity at the equine KIT locus in dominant white (W) horses. *Plos*  
47 *Genetics* 3, 2101-8.
- 48 11. Haase B., Brooks S.A., Tozaki T., Burger D., Poncet P.A., Rieder S., Hasegawa T., Penedo C. & Leeb T. (2009) Seven  
49 novel KIT mutations in horses with white coat colour phenotypes. *Animal Genetics* 40, 623-9.
- 50 12. Haase B., Signer-Hasler H., Binns M., Obexer-Ruff G., Hauswirth R., Bellone R., Burger D., Rieder S., Wade C. &  
51 Leeb T. (2013) Accumulating Mutations in Series of Haplotypes at the KIT and MITF Loci Are Major Determinants  
52 of White Markings in Franches-Montagnes Horses. *Plos One* 8.
- 53 13. Hauswirth R., Haase B., Blatter M., Brooks S., Burger D., Drogemuller C., Gerber V., Henke D., Janda J., Jude R.,  
54 Magdesian K., Matthews J., Poncet P., Svansson V., Tozaki T., Wilkinson-White L., Penedo M., Rieder S. & Leeb T.  
55 (2012) Mutations in MITF and PAX3 Cause "Splashed White" and Other White Spotting Phenotypes in Horses.  
56 *Plos Genetics* 8, 404-12.
- 57 14. Hauswirth R., Jude R., Haase B., Bellone R., Archer S., Holl H., Brooks S., Tozaki T., Penedo M., Rieder S. & Leeb T.  
58 (2013) Novel variants in the KIT and PAX3 genes in horses with white-spotted coat colour phenotypes. *Animal*  
59 *Genetics* 44, 763-5.
- 60 15. Hein J. (2012) A Breed Apart. In: *Paint Horse Journal*, pp. 52-3, Fort Worth, TX.
- 61 16. Henkel J., Lafayette C., Brooks S.A., Martin K., Patterson-Rosa L., Cook D., Jagannathan V. & Leeb T. (2019)  
62 Whole-genome sequencing reveals a large deletion in the MITF gene in horses with white spotted coat colour  
63 and increased risk of deafness. *Anim Genet* 50, 172-4.
- 64 17. Hood N. (1987) Luncheon Honors Association Founders. In: *Paint Horse Journal*, pp. 30-2.
- 65 18. Kalbfleisch T.S., Rice E.S., DePriest M.S., Walenz B.P., Hestand M.S., Vermeesch J.R., O Connell B.L., Fiddes I.T.,  
66 Vershina A.O., Saremi N.F., Petersen J.L., Finno C.J., Bellone R.R., McCue M.E., Brooks S.A., Bailey E., Orlando  
67 L., Green R.E., Miller D.C., Antczak D.F. & MacLeod J.N. (2018) Improved reference genome for the domestic  
68 horse increases assembly contiguity and composition. *Commun Biol* 1, 197.
- 69 19. Marklund L., Moller M.J., Sandberg K. & Andersson L. (1996) A missense mutation in the gene for melanocyte-  
70 stimulating hormone receptor (MC1R) is associated with the chestnut coat color in horses. *Mamm Genome* 7,  
71 895-9.
- 72 20. Marklund S., Moller M., Sandberg K. & Andersson L. (1999) Close association between sequence polymorphism  
73 in the KIT gene and the roan coat color in horses. *Mamm Genome* 10, 283-8.
- 74

- 75 21. Metallinos D.L., Bowling A.T. & Rine J. (1998) A missense mutation in the endothelin-B receptor gene is  
76 associated with Lethal White Foal Syndrome: an equine version of Hirschsprung disease. *Mammalian genome :  
77 official journal of the International Mammalian Genome Society* 9, 426-31.
- 78 22. OMIA (2019) Online Mendelian Inheritance in Animals. URL <http://omia.org/>.
- 79 23. Petersen J., Mickelson J., Cothran E., Andersson L., Axelsson J., Bailey E., Bannasch D., Binns M., Borges A.,  
80 Brama P., Machado A., Distl O., Felicetti M., Fox-Clipsham L., Graves K., Guerin G., Haase B., Hasegawa T.,  
81 Hemmann K., Hill E., Leeb T., Lindgren G., Lohi H., Lopes M., McGivney B., Mikko S., Orr N., Penedo M., Piercy R.,  
82 Raekallio M., Rieder S., Roed K., Silvestrelli M., Swinburne J., Tozaki T., Vaudin M., Wade C. & McCue M. (2013)  
83 Genetic Diversity in the Modern Horse Illustrated from Genome-Wide SNP Data. *Plos One* 8.
- 84 24. Rieder S., Taourit S., Mariat D., Langlois B. & Guerin G. (2001) Mutations in the agouti (ASIP), the extension  
85 (MC1R), and the brown (TYRP1) loci and their association to coat color phenotypes in horses (*Equus caballus*).  
86 *Mammalian genome : official journal of the International Mammalian Genome Society* 12, 450-5.
- 87 25. Santschi E.M., Purdy A.K., Valberg S.J., Vrotsos P.D., Kaese H. & Mickelson J.R. (1998) Endothelin receptor B  
88 polymorphism associated with lethal white foal syndrome in horses. *Mammalian genome : official journal of the  
89 International Mammalian Genome Society* 9, 306-9.
- 90 26. Stachurska A. & Jansen P. (2015) Crypto-tobiano horses in Hucul breed. *Czech Journal of Animal Science* 60, 1-9.
- 91 27. Sundstrom E., Imsland F., Mikko S., Wade C., Sigurdsson S., Pielberg G.R., Golovko A., Curik I., Seltenhammer  
92 M.H., Solkner J., Lindblad-Toh K. & Andersson L. (2012) Copy number expansion of the STX17 duplication in  
93 melanoma tissue from Grey horses. *BMC Genomics* 13, 365.
- 94 28. Trommershausen-Smith A. (1978) Linkage of Tobiano Coat Spotting and Albumin Markers in a Pony Family.  
95 *Journal of Heredity* 69, 214-6.
- 96 29. Yang G.C., Croaker D., Zhang A.L., Manglick P., Cartmill T. & Cass D. (1998) A dinucleotide mutation in the  
97 endothelin-B receptor gene is associated with lethal white foal syndrome (LWFS); a horse variant of  
98 Hirschsprung disease. *Human molecular genetics* 7, 1047-52.

99

100

01 **Tables and Figures:**

02  
 03 Table 1: Details of the nine polymorphisms genotyped for this analysis. The “Reference” allele refers  
 04 to the EquCab3.0 assembly and also happens to be the presumed ancestral or wild type for each of  
 05 these nine variants.

| Locus        | Reference Allele | Alternate Allele | Phenotype                      | Inheritance Pattern for Alternate Allele | Reference                                                                           |
|--------------|------------------|------------------|--------------------------------|------------------------------------------|-------------------------------------------------------------------------------------|
| <i>EDNRB</i> | <i>N</i> *       | <i>O</i>         | Overo spotting/OLWS            | Dominant, homozygous lethal              | Metallinos <i>et al.</i> 1998; Santschi <i>et al.</i> 1998; Yang <i>et al.</i> 1998 |
| <i>KIT</i>   | <i>N</i> *       | <i>TO</i>        | Tobiano spotting               | Dominant                                 | Brooks <i>et al.</i> 2007                                                           |
| <i>KIT</i>   | <i>N</i> *       | <i>SB1</i>       | Sabino spotting                | Additive                                 | Brooks & Bailey 2005                                                                |
| <i>KIT</i>   | <i>N</i> *       | <i>W5</i>        | Variable white spotting        | Dominant, presumed homozygous lethal     | Haase <i>et al.</i> 2009                                                            |
| <i>KIT</i>   | <i>N</i> *       | <i>W10</i>       | Variable white spotting        | Dominant, presumed homozygous lethal     | Haase <i>et al.</i> 2009                                                            |
| <i>KIT</i>   | <i>N</i> *       | <i>W20</i>       | Variable white spotting        | Dominant                                 | Hauswirth <i>et al.</i> 2013                                                        |
| <i>MITF</i>  | <i>N</i> *       | <i>SW1</i>       | Splashed white spotting        | Dominant                                 | Hauswirth <i>et al.</i> 2012                                                        |
| <i>MITF</i>  | <i>N</i> *       | <i>SW3</i>       | Splashed white spotting        | Dominant, presumed homozygous lethal     | Hauswirth <i>et al.</i> 2012                                                        |
| <i>PAX3</i>  | <i>N</i> *       | <i>SW2</i>       | Splashed white spotting        | Dominant, presumed homozygous lethal     | Hauswirth <i>et al.</i> 2012                                                        |
| ASIP         | A                | a                | Black/Bay pigment distribution | Recessive                                | Rieder <i>et al.</i> 2001                                                           |
| MC1R         | E                | e                | Black/Red pigmentation         | Recessive                                | Marklund <i>et al.</i> 1996                                                         |

06 \*For these loci the “*N*” designation is used by the UC Davis commercial testing service to communicate a wild type allele.

07  
 08

L9 Table 2. Genotype counts and allele frequencies for nine white spotting variants and two base coat  
 L10 color loci genotyped among 1054 APHA registered horses, within each of the two registration  
 L11 categories. Data are presented as genotype counts for the homozygous reference (Hom Ref),  
 L12 heterozygous (Het) and homozygous alternate (Hom Alt) states, as well as the frequency of the  
 L13 reference (*f*Ref) and alternate (*f*Alt) alleles.

|                                      | Regular Registry<br>(n= 773) |     |         |              |              | Solid Paint-bred Registry<br>(n= 281) |     |         |              |              | Total<br>(n= 1054) |     |         |              |              |
|--------------------------------------|------------------------------|-----|---------|--------------|--------------|---------------------------------------|-----|---------|--------------|--------------|--------------------|-----|---------|--------------|--------------|
|                                      | Hom Ref                      | Het | Hom Alt | <i>f</i> Ref | <i>f</i> Alt | Hom Ref                               | Het | Hom Alt | <i>f</i> Ref | <i>f</i> Alt | Hom Ref            | Het | Hom Alt | <i>f</i> Ref | <i>f</i> Alt |
| <i>EDNRB- O</i><br>(Frame Overo)     | 570                          | 203 | 0       | 0.87         | 0.13         | 263                                   | 18  | 0       | 0.97         | 0.06         | 833                | 221 | 0       | 0.88         | 0.12         |
| <i>KIT- TO</i><br>(Tobiano)          | 572                          | 142 | 59      | 0.83         | 0.17         | 281                                   | 0   | 0       | 1.00         | 0.00         | 853                | 142 | 59      | 0.88         | 0.12         |
| <i>KIT- SB1</i><br>(Sabino1)         | 748                          | 24  | 1       | 0.98         | 0.02         | 281                                   | 0   | 0       | 1.00         | 0.00         | 1029               | 24  | 1       | 0.99         | 0.01         |
| <i>KIT- W05</i><br>(Variable White)  | 773                          | 0   | 0       | 1.00         | 0.00         | 281                                   | 0   | 0       | 1.00         | 0.00         | 1054               | 0   | 0       | 1.00         | 0.00         |
| <i>KIT- W10</i><br>(Variable White)  | 771                          | 2   | 0       | 1.00         | 0.00         | 281                                   | 0   | 0       | 1.00         | 0.00         | 1052               | 2   | 0       | 1.00         | 0.00         |
| <i>KIT- W20</i><br>(Variable White)  | 404                          | 319 | 50      | 0.73         | 0.27         | 196                                   | 74  | 11      | 0.83         | 0.17         | 600                | 393 | 61      | 0.76         | 0.24         |
| <i>PAX3- SW2</i><br>(Splashed White) | 757                          | 15  | 1       | 0.99         | 0.01         | 272                                   | 9   | 0       | 0.98         | 0.03         | 1029               | 24  | 1       | 0.99         | 0.01         |
| <i>MITF- SW1</i><br>(Splashed White) | 680                          | 90  | 3       | 0.94         | 0.06         | 263                                   | 17  | 1       | 0.96         | 0.07         | 943                | 107 | 4       | 0.95         | 0.05         |
| <i>MITF- SW3</i><br>(Splashed White) | 769                          | 4   | 0       | 0.99         | 0.01         | 281                                   | 0   | 0       | 1.00         | 0.00         | 1050               | 4   | 0       | 1.00         | 0.00         |
| <i>ASIP- A</i><br>(Bay/Black)        | 316                          | 323 | 134     | 0.62         | 0.38         | 115                                   | 118 | 48      | 0.62         | 0.38         | 431                | 441 | 182     | 0.62         | 0.38         |
| <i>MC1R- E</i><br>(Black/Red)        | 78                           | 234 | 461     | 0.25         | 0.75         | 9                                     | 82  | 190     | 0.16         | 0.82         | 87                 | 316 | 651     | 0.23         | 0.77         |

L14

L15



Table 3: Horse designation to the Regular or Solid Paint-bred registry divisions by genotype and genotype combinations (for simplicity, the table reports only genotypes/combinations observed in at least three horses.)

|                        |                            | Registry Category        |                     |           |      |
|------------------------|----------------------------|--------------------------|---------------------|-----------|------|
|                        |                            | Regular                  | Solid Paint-bred    | % Regular |      |
|                        |                            | Genotype                 |                     |           |      |
|                        |                            | <i>N/N</i>               | 97                  | 172       | 36%  |
| Single Locus Genotypes |                            | <i>N/SW2</i>             | 7                   | 3         | 70%  |
|                        |                            | <i>W20/W20</i>           | 24                  | 10        | 71%  |
|                        |                            | <i>N/W20</i>             | 166                 | 58        | 74%  |
|                        |                            | <i>N/SW1</i>             | 34                  | 8         | 81%  |
|                        |                            | <i>N/O</i>               | 64                  | 10        | 86%  |
|                        |                            | <i>N/SW3</i>             | 3                   | 0         | 100% |
|                        |                            | <i>N/TO</i>              | 97                  | 0         | 100% |
|                        |                            | <i>TO/TO</i>             | 57                  | 0         | 100% |
|                        |                            | <i>N/SB1</i>             | 8                   | 0         | 100% |
|                        | Multi-allele Genotypes     |                          | <i>N/SW2, N/W20</i> | 1         | 3    |
|                        |                            | <i>N/SW1, N/SW2</i>      | 5                   | 2         | 71%  |
|                        |                            | <i>N/SW1, N/W20</i>      | 16                  | 6         | 73%  |
|                        |                            | <i>N/O, N/SW1W</i>       | 7                   | 1         | 88%  |
|                        |                            | <i>N/O, N/W20</i>        | 82                  | 7         | 92%  |
|                        |                            | <i>N/TO, N/SW1</i>       | 5                   | 0         | 100% |
|                        |                            | <i>N/TO, N/O</i>         | 5                   | 0         | 100% |
|                        |                            | <i>N/TO, N/W20</i>       | 25                  | 0         | 100% |
|                        |                            | <i>N/O, N/SB1</i>        | 4                   | 0         | 100% |
|                        |                            | <i>N/SB1, N/W20</i>      | 5                   | 0         | 100% |
|                        |                            | <i>N/O, W20/W20</i>      | 19                  | 0         | 100% |
|                        |                            | <i>N/SW1, W20/W20</i>    | 4                   | 0         | 100% |
|                        |                            | <i>N/TO, N/O, N/W20</i>  | 7                   | 0         | 100% |
|                        |                            | <i>N/O, N/SW1, N/W20</i> | 9                   | 0         | 100% |
|                        | <i>N/O, N/SW1, W20/W20</i> | 3                        | 0                   | 100%      |      |

39 Table 4: Horse counts for the Regular and Solid Paint-bred phenotypes compared to the total  
 40 number of white spotting pattern alleles at the nine loci tested, and genotypes at the *MC1R* and *ASIP*  
 41 coat color loci in a subset of 368 horses.

|                                                |                        | Registry Category |                  |           |
|------------------------------------------------|------------------------|-------------------|------------------|-----------|
|                                                |                        | Regular           | Solid Paint-bred | % Regular |
| Total # of White Spotting Alleles<br>(n= 1054) | 0                      | 97                | 172              | 36%       |
|                                                | 1                      | 382               | 79               | 83%       |
|                                                | 2                      | 240               | 29               | 89%       |
|                                                | 3                      | 51                | 0                | 100%      |
|                                                | 4                      | 3                 | 0                | 100%      |
|                                                | 5                      | 1                 | 0                | 100%      |
| <i>MC1R</i> - <i>ASIP</i> Geno.<br>(n=368)     | <i>E</i> -, <i>a/a</i> | 13                | 7                | 65%       |
|                                                | <i>E</i> -, <i>A</i> - | 57                | 23               | 71%       |
|                                                | <i>e/e</i>             | 219               | 49               | 82%       |

42

43

44

45

46

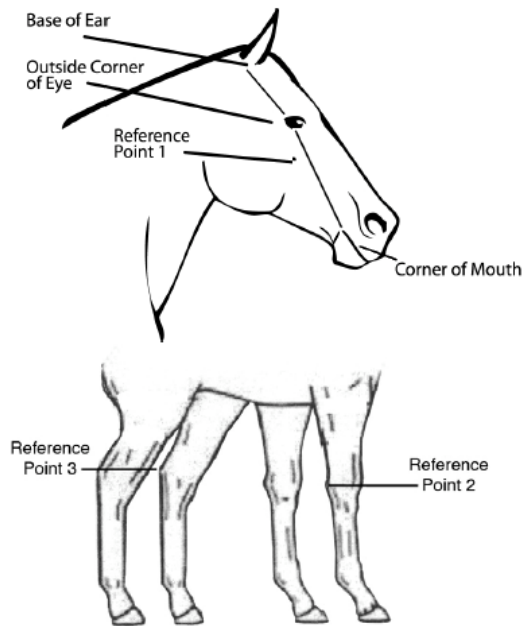

47

48 Figure 1: Anatomical landmarks on the face and limbs of the APHA horse are used to determine the  
49 extent of white spotting patterns, and to designate each registered horse to either the Regular or  
50 Solid Paint-bred sub-registries. To enter the Regular registry, a proposed horse must possess at least  
51 2" of white hair, as well as underlying unpigmented skin, on the body surface beyond these reference  
52 lines.

53

54
